# Supplementary material
Source: MDPI journal article supplement (https://www.mdpi.com/2073-4395/10/8/1203)
Supplement: s1 [file s1]

**Supplementary Table 1.** The relative plant yield efficiency,  $PYE = \bar{x}_i / \bar{x}_.$ , based on the hybrid average over sites mean yield per plant ( $\bar{x}_i$ ) and the over hybrids and sites mean yield per plant ( $\bar{x}_.$ ); the plant yield homeostasis index,  $PYH = 1/pCV_i$ , based on the coefficient of variation for plant-to-plant variability ( $pCV_i$ ); and the plant yield efficiency by homeostasis index ( $PYEH$ ),  $PYEH = PYE * PYH$ . Data obtained at the BD over five sites and two irrigation regimes

| Hybrid | $\bar{x}_i$ | $PYE$ | $pCV_i$ | $PYH$ | $PYEH$ |
|--------|-------------|-------|---------|-------|--------|
| H-1    | 710         | 1.00  | 0.29    | 3.61  | 3.61   |
| H-2    | 585         | 0.83  | 0.35    | 2.82  | 2.33   |
| H-3    | 647         | 0.91  | 0.34    | 2.98  | 2.72   |
| H-4    | 663         | 0.93  | 0.31    | 3.19  | 2.98   |
| H-5    | 581         | 0.82  | 0.25    | 4.04  | 3.30   |
| H-6    | 767         | 1.08  | 0.32    | 3.22  | 3.48   |
| H-7    | 1014        | 1.43  | 0.34    | 2.90  | 4.14   |
